# Supplementary material for: ARTP Mutagenesis of Schizochytrium sp. PKU#Mn4 and Clethodim-Based Mutant Screening for Enhanced Docosahexaenoic Acid Accumulation
Source: MDPI journal article supplement (doi:10.3390/md19100564), 2021-10-07
Supplement: s1 [file s1]

## Supplementary Information

### **ARTP Mutagenesis of *Schizochytrium* sp. PKU#Mn4 and Clethodim-based Mutant Screening for Enhanced Docosahexaenoic Acid Accumulation**

Lu Liu <sup>1</sup>, Mohan Bai <sup>1</sup>, Sai Zhang <sup>1,2</sup>, Jiantao Li <sup>1</sup>, Xianhua Liu <sup>1</sup>, Biswarup Sen <sup>1, \*</sup>,

Guangyi Wang <sup>1, 3, \*</sup>

<sup>1</sup>Center for Marine Environmental Ecology, School of Environmental Science and  
Engineering, Tianjin University, Tianjin 300072, China

<sup>2</sup>Polar Research Institute of China, Shanghai 200136, China

<sup>3</sup>Key Laboratory of Systems Bioengineering (Ministry of Education), Tianjin  
University, Tianjin 300072, China

**\*Corresponding author.**

E-mail: bsen@tju.edu.cn; gywang@tju.edu.cn

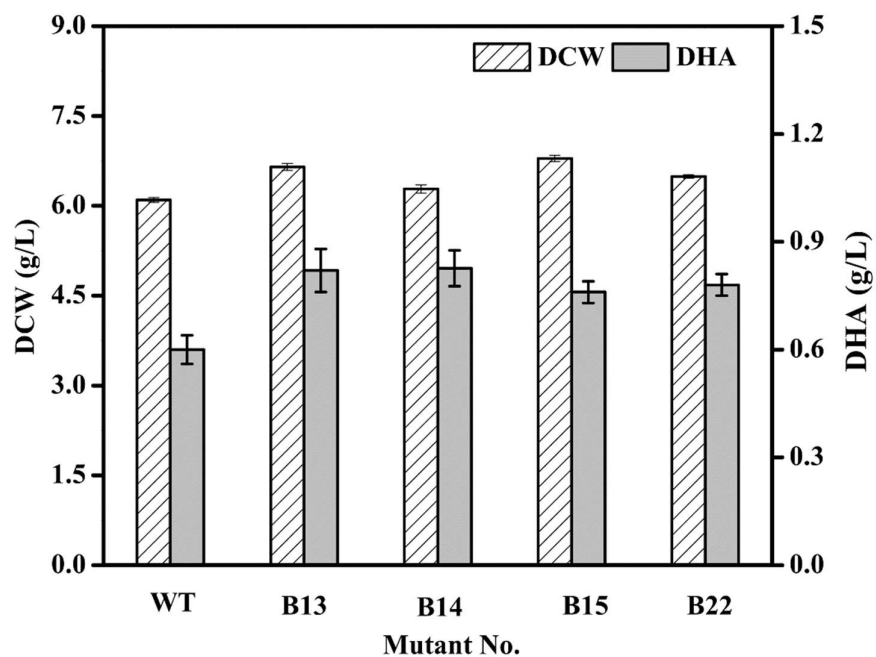

**Figure S1.** Biomass and DHA contents of the wild-type strain PKU#Mn4 and its mutants resulting from the first round of ARTP mutagenesis and clethodim (80  $\mu\text{g/mL}$ )-based screening. WT strain and mutants were cultured in M4 medium and the culture samples were collected at 96 h for biomass and DHA quantification.

**Table S1.** Palmitic acid content of the wild-type strain PKU#Mn4 and its mutants obtained from the second round of ARTP mutagenesis and clethodim-based screening.

| <b>Mutant/Strain</b> | <b>C16:0</b> |
|----------------------|--------------|
| WT                   | 0.88         |
| A10                  | 1.19         |
| A11                  | 1.20         |
| A17                  | 1.16         |
| A22                  | 1.30         |
| A23                  | 1.22         |
| A25                  | 1.29         |
| A29                  | 1.23         |
| A36                  | 1.18         |
| A49                  | 1.08         |
| A54                  | 1.21         |
| A74                  | 1.20         |
| A75                  | 0.87         |
| A78                  | 1.36         |
| A81                  | 1.24         |
| A89                  | 1.38         |
| A92                  | 1.40         |

Note: WT strain and mutants were cultured in M4 medium and the culture samples were collected at 96 h for fatty acids quantification.
